# Supplementary material for: Abnormal wiring of the structural connectome in adults with ADHD
Source: PubMed Central journal article supplement (PMC10631790; doi:10.1162/netn_a_00326), 2023-12-22
Supplement: netn-7-4-1302-s001.pdf [file netn-7-4-1302-s001.pdf]

# Supplementary results

## Article title

Abnormal wiring of the structural connectome in adults with ADHD

## Authors

Tuija Tolonen, Timo Roine, Kimmo Alho, Sami Leppämäki, Pekka Tani, Anniina Koski, Matti Laine, Juha Salmi

**Supplementary figures** pp. 2–7

**Supplementary tables** pp. 8–12

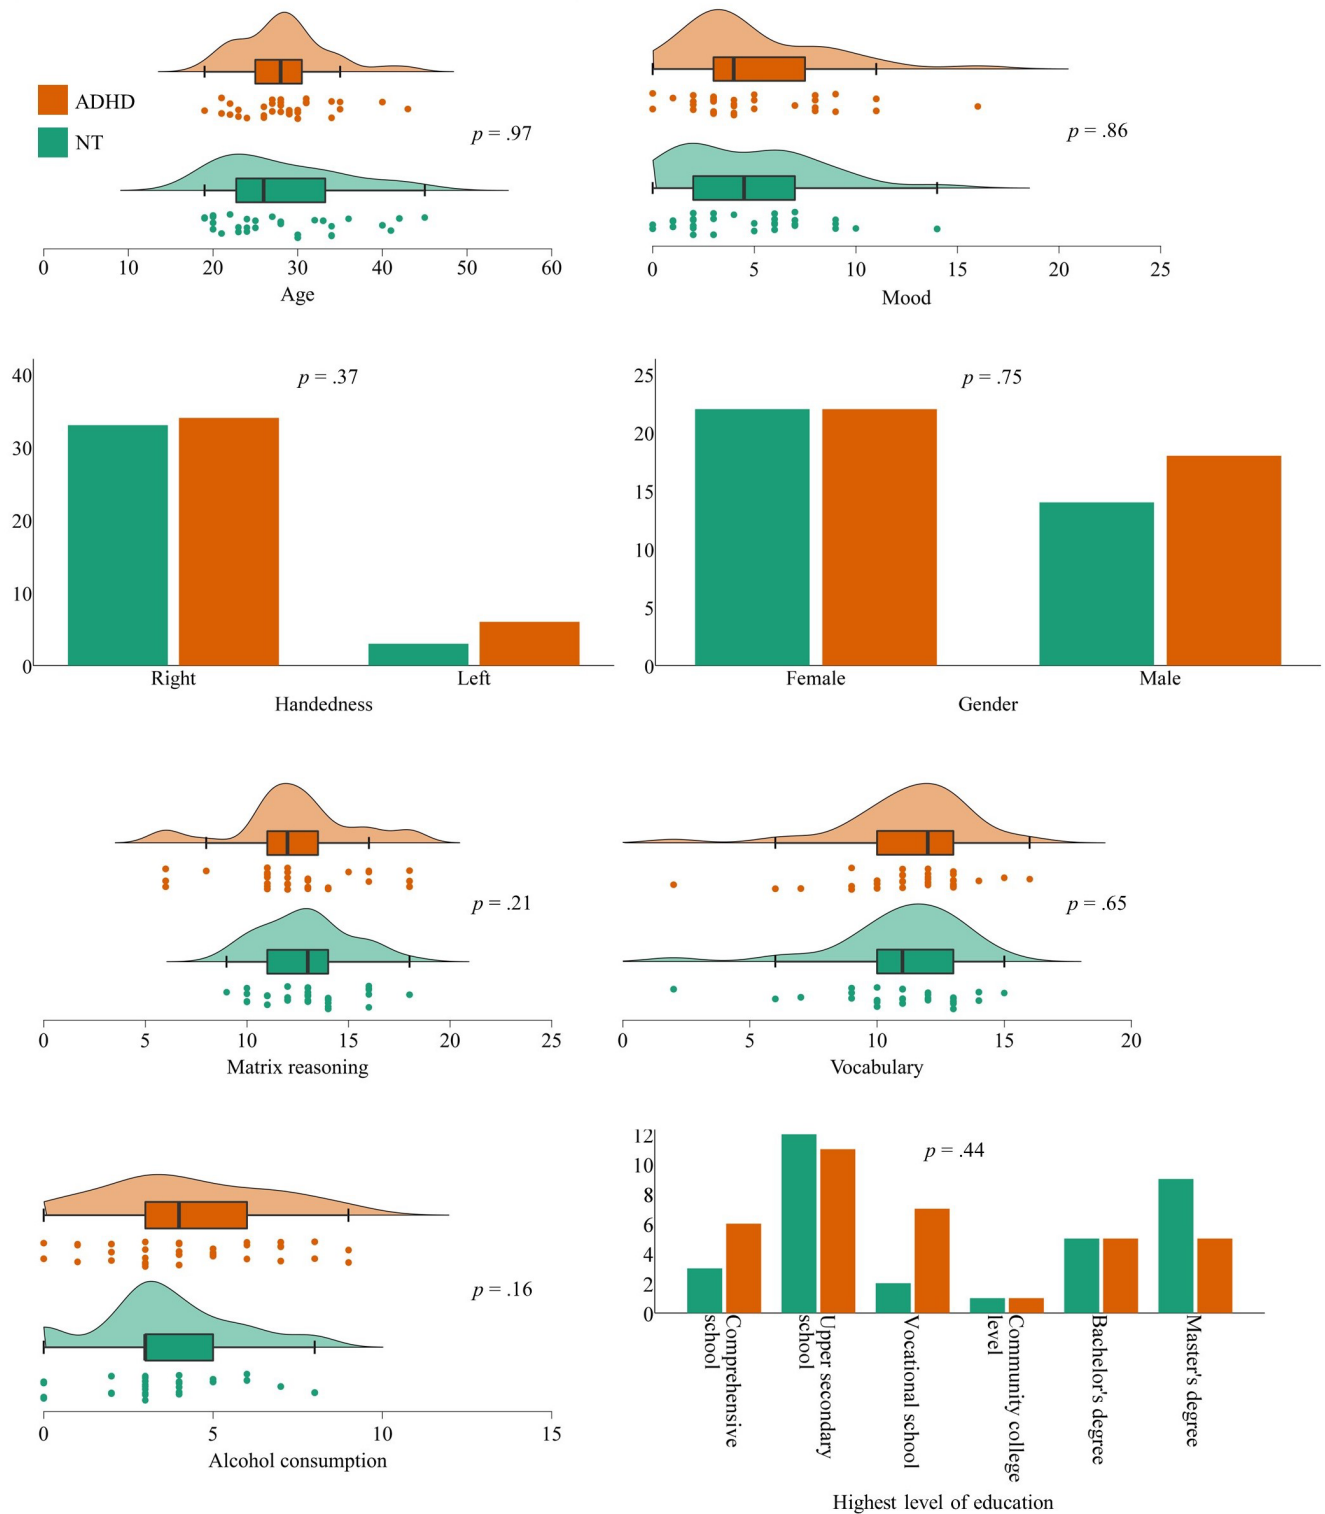

**Supplementary figure 1.** Demographic and clinical characteristics of the participants. Discrete variables are visualized with raincloud plots displaying individual data points, density plots and box plots. Categorical variables are illustrated with bar plots indicating number of participants in each category.

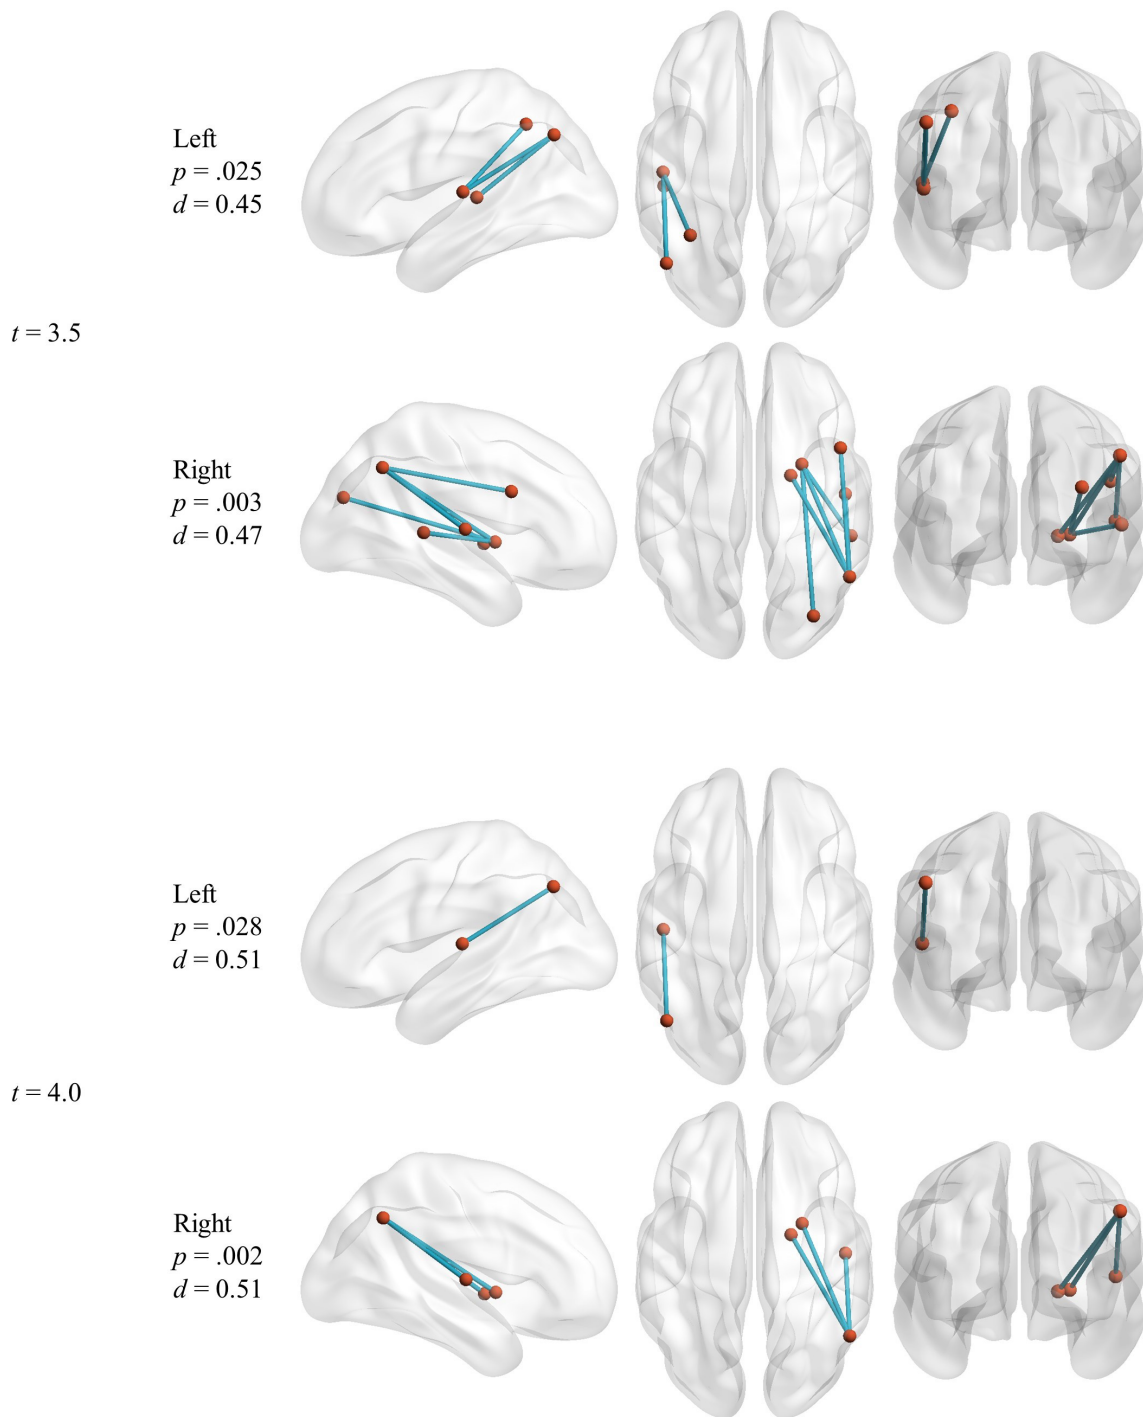

**Supplementary figure 2.** Networks identified with NBS distinguishing adults with and without ADHD with  $t$ -statistic thresholds 3.5 (upper rows) and 4.0 (bottom rows) using the Destrieux atlas. Edges represent decreased connectivity in the ADHD group compared to the NT adults. All  $p$ -values are FWE-corrected. With a threshold of 4.0, the left-sided network was identified only with intensity as a measure of network size. All other results are from using extend as a measure of network size.

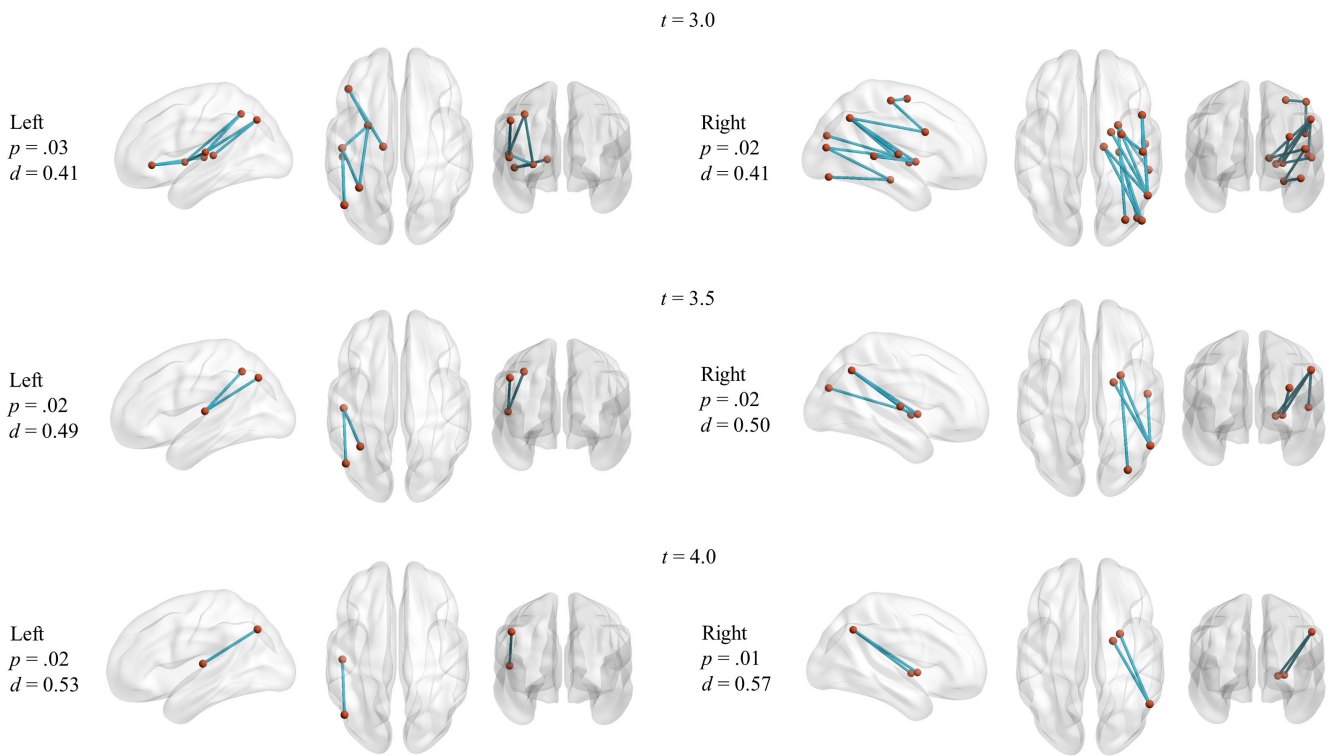

**Supplementary figure 3.** Results of the NBS group analysis after removing six outlier participants (edge weight  $> 2$  SD in two or more connections in the NBS networks) from the NT group. Compared with the main results (see the main text), the subcallosal gyrus was no longer part of the left-sided network. In the right-sided network, two nodes (the intraparietal sulcus and middle occipital sulcus/lunate sulcus) were not present after outlier exclusion, and the inferior occipital sulcus appeared as a new node. The left-sided network was identified only with intensity as a measure of network size. Results of the right-sided network are presented by using extent as a measure of network size.

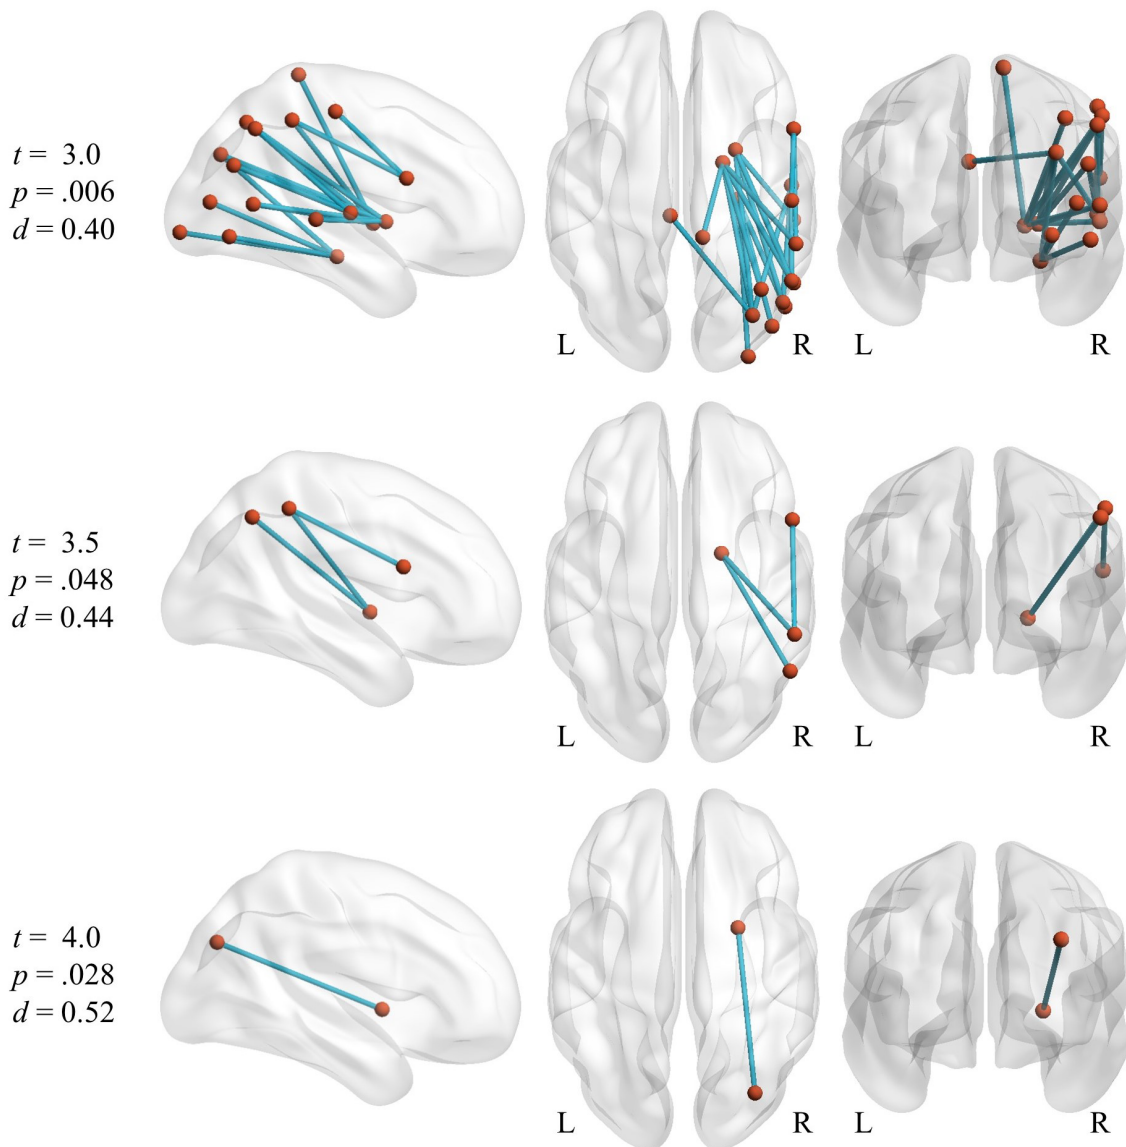

**Supplementary figure 4.** NBS results of the control analyses using the Schaefer parcellation. NBS identified decreased connectivity in the ADHD group as compared with the NT adults in a right-sided network largely overlapping with the network obtained with the Destrieux atlas. All  $p$ -values are FWE-corrected. With a threshold of 4.0, the network was identified only with intensity as a measure of network size. The other results are from using extend as a measure of network size. No statistically significant networks with ADHD > NT were identified (smallest  $p$ -value:  $t = 4.0$ ,  $p = .11$ , FWE-corrected). No networks associated with the behavioural measures were found (smallest  $p$ -values: inattention:  $t = 3.0$ ,  $p = .09$ ; hyperactivity-impulsivity:  $t = 3.5$ ,  $p = .36$ ; commission errors:  $t = 4.0$ ,  $p = .09$ ; omission errors:  $t = 3.0$ ,  $p = .33$ , FWE-corrected).

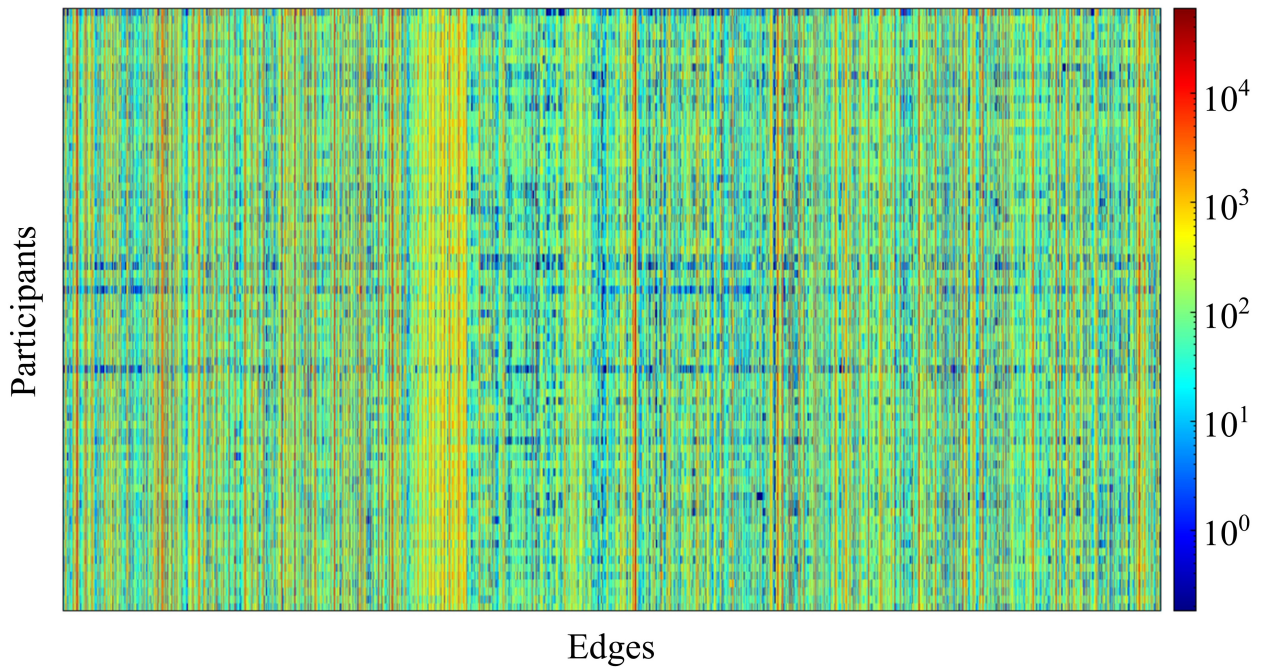

**Supplementary figure 5.** Heatmap figure of the edge weights of the whole connectome. Rows represent individual participants and columns represent connections between each two nodes in the parcellation. Colors illustrate the edge weights (i.e., number of streamlines) of the pairwise connections. Edges in which the edge weight was zero for all participants are omitted. Note that a logarithmic transformation was applied to the color scheme for visualization purposes.

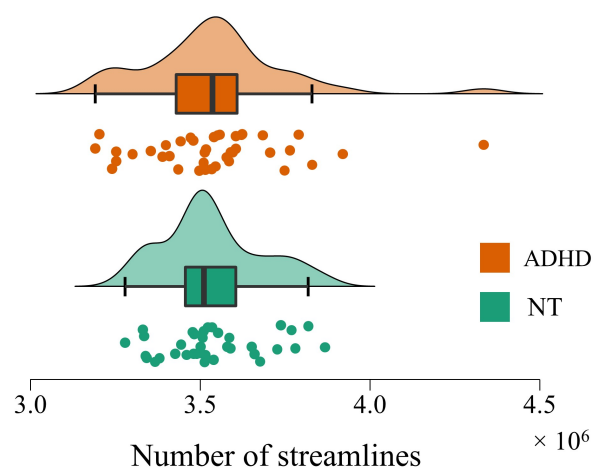

**Supplementary figure 6.** Total count of streamlines of the whole connectome by group. The raincloud plots display individual data points, density plots and box plots.

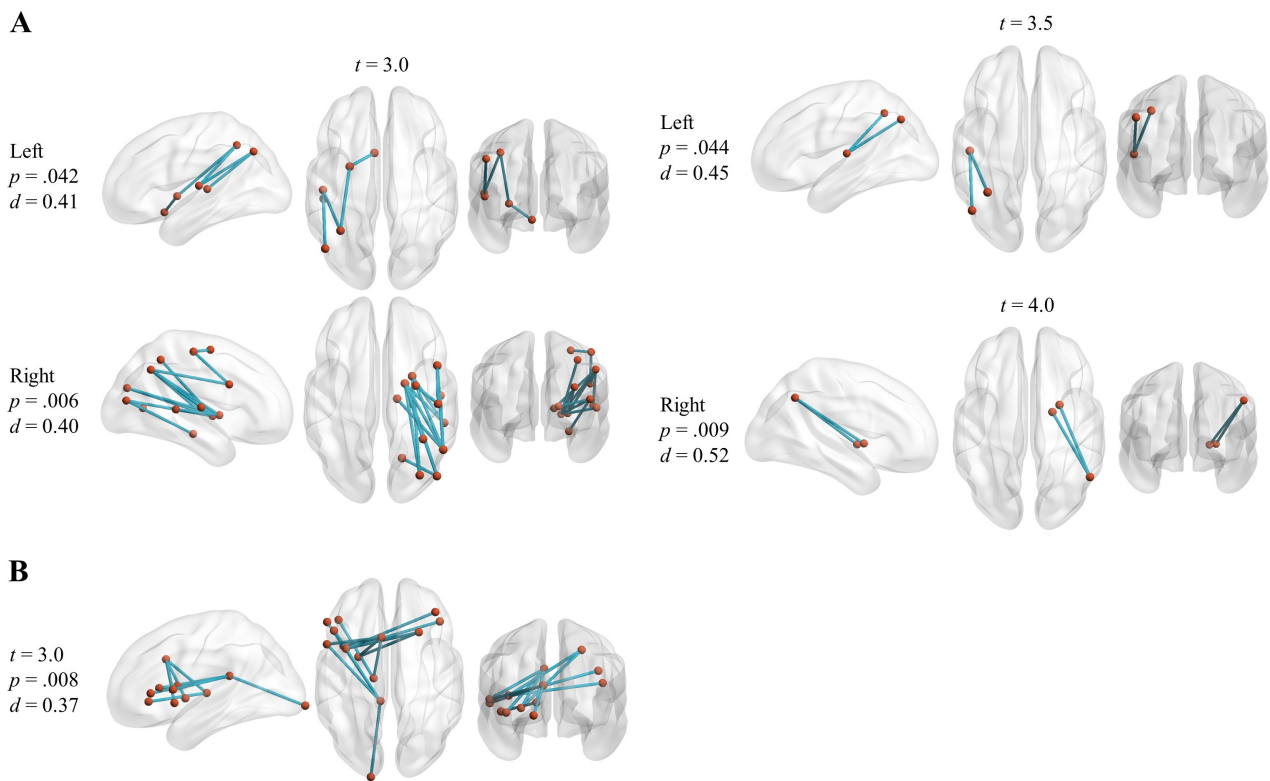

**Supplementary figure 7.** Results of the NBS analyses after removing one outlier participant (total count of streamlines  $> 3$  SD) from the ADHD group. Only networks with differences compared with the main results are shown. (A) In the group analysis after the outlier exclusion, the anterior lateral sulcus and thalamus were no longer present in the left-sided network. In turn, in the right-sided network, the middle occipital sulcus/lunate sulcus node was not present after the outlier exclusion, and the calcarine sulcus appeared as a new node. The left-sided network was identified only with intensity as a measure of network size. Results of the right-sided network are presented by using extent as a measure of network size. (B) In the network representing hypoconnectivity associated with higher amount of commission errors in CPT-2, the left superior frontal gyrus and right putamen were not present after the outlier exclusion, and the right inferior frontal sulcus appeared as a new node.

**Supplementary table 1.** Nodes and their center of mass MNI coordinates in the networks identified with NBS using the Destrieux atlas.

| Node                                                        | Center of mass coordinates (x, y, z) |
|-------------------------------------------------------------|--------------------------------------|
| Left-sided network, ADHD < NT                               |                                      |
| Angular gyrus                                               | -46, -67, 40                         |
| Subcallosal gyrus                                           | -6, 11, -14                          |
| Anterior transverse temporal gyrus                          | -48, -19, 9                          |
| Anterior lateral sulcus (horizontal)                        | -43, 31, -3                          |
| Intraparietal sulcus                                        | -34, -53, 45                         |
| Transverse temporal sulcus                                  | -48, -27, 7                          |
| Thalamus                                                    | -13, -18, 5                          |
| Putamen                                                     | -26, 0, 0                            |
| Right-sided network, ADHD < NT                              |                                      |
| Thalamus                                                    | 13, -17, 5                           |
| Putamen                                                     | 25, 1, 1                             |
| Pallidum                                                    | 19, -4, 0                            |
| Hippocampus                                                 | 26, -21, -15                         |
| Middle occipital gyrus                                      | 45, -79, 14                          |
| Angular gyrus                                               | 50, -58, 40                          |
| Postcentral gyrus                                           | 46, -21, 56                          |
| Anterior transverse temporal gyrus                          | 48, -14, 8                           |
| Intraparietal sulcus                                        | 34, -49, 49                          |
| Middle occipital sulcus and lunate sulcus                   | 34, -84, 5                           |
| Superior occipital sulcus and transverse occipital sulcus   | 31, -79, 24                          |
| Inferior precentral sulcus                                  | 45, 10, 28                           |
| Superior precentral sulcus                                  | 28, -6, 57                           |
| Superior temporal sulcus                                    | 51, -36, 6                           |
| Connectivity associated with commission errors in the CPT-2 |                                      |
| L aMCC                                                      | -7, 16, 33                           |
| L inferior frontal gyrus (opercular)                        | -53, 10, 8                           |
| L short insular gyri                                        | -39, 9, -3                           |
| L superior frontal gyrus                                    | -10, 31, 43                          |
| L superior circular sulcus                                  | -37, 7, 11                           |
| L pericallosal sulcus                                       | -8, -37, 19                          |
| L inferior frontal gyrus (triangular)                       | -52, 28, 5                           |
| L anterior lateral sulcus (vertical)                        | -47, 22, 9                           |
| L occipital pole                                            | -16, -101, -6                        |
| L thalamus                                                  | -13, -18, 5                          |
| L anterior lateral sulcus (horizontal)                      | -43, 31, -3                          |
| L putamen                                                   | -26, 0, 0                            |
| R putamen                                                   | 25, 1, 1                             |
| R middle frontal gyrus                                      | 38, 37, 31                           |
| R superior frontal sulcus                                   | 24, 20, 49                           |

Note. L = left, R = right, aMCC = middle-anterior part of the cingulate gyrus and sulcus



**Supplementary table 2.** Nodes of the NBS networks distinguishing adults with ADHD from NT controls identified with *t*-statistic thresholds 3.5 and 4.0 using the Destrieux atlas.

| Network        | Node                                                      |
|----------------|-----------------------------------------------------------|
| <i>t</i> = 3.5 |                                                           |
| Left-sided     | Angular gyrus                                             |
|                | Intraparietal sulcus                                      |
|                | Anterior lateral sulcus                                   |
|                | Anterior transverse temporal gyrus                        |
| Right-sided    | Putamen                                                   |
|                | Pallidum                                                  |
|                | Angular gyrus                                             |
|                | Anterior transverse temporal gyrus                        |
|                | Superior occipital sulcus and transverse occipital sulcus |
|                | Inferior precentral sulcus                                |
|                | Superior temporal sulcus                                  |
| <i>t</i> = 4.0 |                                                           |
| Left-sided     | Angular gyrus                                             |
|                | Anterior transverse temporal gyrus                        |
| Right-sided    | Putamen                                                   |
|                | Pallidum                                                  |
|                | Angular gyrus                                             |
|                | Anterior transverse temporal gyrus                        |

**Supplementary table 3.** Group differences of global graph theory metrics obtained with the Destrieux atlas.

| Metric                                | ADHD                   | NT                     | <i>F</i> ( <i>df</i> ) | <i>p</i> |
|---------------------------------------|------------------------|------------------------|------------------------|----------|
|                                       | <i>M</i> ( <i>SD</i> ) | <i>M</i> ( <i>SD</i> ) |                        |          |
| Betweenness centrality                | 540.28 (35.77)         | 544.35 (28.95)         | 0.29(1)                | .59      |
| Strength                              | 43193 (2599)           | 43144 (1810)           | 0.01(1)                | .93      |
| Small-worldness                       | 1.97 (0.42)            | 1.99 (0.54)            | 0.06(1)                | .81      |
| Normalized clustering coefficient     | 2.51 (0.12)            | 2.49 (0.09)            | 0.68(1)                | .41      |
| Normalized characteristic path length | 1.32 (0.20)            | 1.30 (0.19)            | 0.19(1)                | .67      |
| Normalized global efficiency          | 0.74 (0.03)            | 0.75 (0.02)            | 1.54(1)                | .22      |
| Normalized modularity                 | 1.45 (0.02)            | 1.45 (0.02)            | 0.33(1)                | .57      |

Note. *M* = mean, *SD* = standard deviation, *df* = degrees of freedom.

**Supplementary table 4.** Correlations between ADHD symptoms, CPT performance and global graph theory metrics obtained with the Destrieux atlas.

| Metric                                | Inattention |                  | Hyperactivity-impulsivity |                  | Commission errors |                  | Omission errors |                  |
|---------------------------------------|-------------|------------------|---------------------------|------------------|-------------------|------------------|-----------------|------------------|
|                                       | ADHD group  | All participants | ADHD group                | All participants | ADHD group        | All participants | ADHD group      | All participants |
| Betweenness centrality                | -.04        | -.06             | .28                       | .07              | .06               | -.11             | .27             | .11              |
| Strength                              | .19         | .14              | .28                       | .15              | -.15              | -.01             | .001            | .09              |
| Small-worldness                       | -.18        | .10              | .02                       | .07              | .14               | .09              | .04             | .02              |
| Normalized clustering coefficient     | -.25        | -.01             | .01                       | .06              | .01               | .13              | .08             | .10              |
| Normalized characteristic path length | .13         | -.04             | -.05                      | -.05             | -.16              | -.05             | -.10            | -.05             |
| Normalized global efficiency          | -.04        | -.08             | -.10                      | -.13             | .09               | -.05             | .01             | -.01             |
| Normalized modularity                 | .11         | .21              | <b>.33*</b>               | .22              | .09               | .10              | .03             | .04              |

Note. \*  $p < .05$ .

**Supplementary table 5.** *Nodes and their center of mass MNI coordinates in the networks identified with NBS using the Schaefer parcellation.*

| Node                               | Center of mass coordinates (x, y, z) |
|------------------------------------|--------------------------------------|
| R hippocampus                      | 26, -21, -15                         |
| R putamen                          | 25, 1, 1                             |
| R pallidum                         | 19, -4, 0                            |
| R visual network area 5            | 48, -71, -6                          |
| R visual network area 8            | 31, -94, -4                          |
| R visual network area 11           | 42, -80, 10                          |
| R visual network area 15           | 33, -75, 32                          |
| R DAN posterior area 2             | 52, -60, 9                           |
| R DAN precentral ventral area 1    | 52, 11, 21                           |
| R somatomotor network area 1       | 51, -15, 5                           |
| R somatomotor network area 9       | 51, -22, 52                          |
| R somatomotor network area 17      | 10, -39, 69                          |
| R control network parietal area 2  | 53, -42, 48                          |
| R control network parietal area 3  | 37, -63, 47                          |
| R DMN parietal area 1              | 47, -69, 27                          |
| R DMN parietal area 3              | 51, -59, 44                          |
| R DMN temporal area 5              | 52, -31, 2                           |
| L control network cingulate area 1 | -5, -29, 28                          |

*Note.* R = right, L = left, DAN = dorsal attention network, DMN = default mode network

**Supplementary table 6.** *Group differences of global graph theory metrics obtained with the Schaefer parcellation.*

| Metric                                | ADHD<br><i>M (SD)</i> | NT<br><i>M (SD)</i> | <i>F(df)</i> | <i>p</i> |
|---------------------------------------|-----------------------|---------------------|--------------|----------|
| Betweenness centrality                | 743.25 (42.04)        | 750.61 (42.16)      | 0.58(1)      | .45      |
| Strength                              | 31588 (2257)          | 31526 (1444)        | 0.02(1)      | .89      |
| Small-worldness                       | 2.00 (1.20)           | 1.84 (0.73)         | 0.52(1)      | .48      |
| Normalized clustering coefficient     | 3.20 (0.15)           | 3.18 (0.13)         | 0.76(1)      | .39      |
| Normalized characteristic path length | 1.80 (0.40)           | 1.85 (0.32)         | 0.26(1)      | .62      |
| Normalized global efficiency          | 0.61 (0.02)           | 0.61 (0.01)         | 0.01(1)      | .93      |
| Normalized modularity                 | 1.57 (0.03)           | 1.58 (0.03)         | 0.33(1)      | .57      |

*Note.* *M* = mean, *SD* = standard deviation, *df* = degrees of freedom.

**Supplementary table 7.** *Correlations between ADHD symptoms, CPT performance and global graph theory metrics within the ADHD group obtained with the Schaefer parcellation.*

| Metric                                | Inattention | Hyper-activity-impulsivity | Commission errors | Omission errors |
|---------------------------------------|-------------|----------------------------|-------------------|-----------------|
| Betweenness centrality                | .04         | -.05                       | -.04              | -.07            |
| Strength                              | .18         | .27                        | -.13              | -.001           |
| Small-worldness                       | -.22        | -.18                       | .08               | -.08            |
| Normalized clustering coefficient     | -.30        | .02                        | .03               | .13             |
| Normalized characteristic path length | .23         | .08                        | -.10              | -.02            |
| Normalized global efficiency          | -.05        | -.18                       | .05               | -.09            |
| Normalized modularity                 | -.11        | .03                        | -.11              | .11             |

*Note.* \*  $p < .05$ .

**Supplementary table 8.** *Participants' mean range of movement during diffusion-weighted imaging. Standard deviations, and minimum and maximum values in parentheses.*

| Variable                        | ADHD group<br>( $N = 40$ ) | Neurotypical group<br>( $N = 36$ ) |
|---------------------------------|----------------------------|------------------------------------|
| RMS movement, mm                |                            |                                    |
| relative to the first volume    | 0.78 (0.46, 0.38–2.86)     | 0.78 (0.59, 0.37–3.71)             |
| relative to the previous volume | 0.22 (0.16, 0.10–1.00)     | 0.21 (0.07, 0.11–0.47)             |
| Restricted RMS movement, mm     |                            |                                    |
| relative to the first volume    | 0.92 (0.79, 0.24–4.85)     | 1.00 (0.93, 0.27–5.27)             |
| relative to the previous volume | 0.18 (0.23, 0.07–1.31)     | 0.14 (0.10, 0.07–0.48)             |

*Note.* RMS = root mean square.
